# Supplementary material for: Changes in Tea Plant Secondary Metabolite Profiles as a Function of Leafhopper Density and Damage
Source: Front Plant Sci. 2020 May 29;11:636. doi: 10.3389/fpls.2020.00636 (PMC7272924; doi:10.3389/fpls.2020.00636)
Supplement: Supplementary file 2 [file Table_1.xlsx]

## Sheet: Sheet1
Supplementary Table S1: Complete list of volatiles found in the experiment. RI is the average retention index of the compounds across all samples. RI_lab_lit is either a literature retention index or a retention index derrived from authentic standards, as indicated in the "source" column. “density_rda_load” and “damage_rda_load” are loadings from the RDA analyses with leafhopper density and leaf …

## Sheet: TableS1
Compound	CAS	RI	RI_lab_lit	Source	density_rda_load	density_rda_corr	density_corr_pval	damage_rda_load	damage_rda_corr	damage_corr_pval
1	NA	766.547	NA	NA	0.0476217	0.303477	0.220863	0.0167158	0.129438	0.608723
Isobutyric acid	79-31-2	794.904	785	NIST	0.0511917	0.200288	0.425527	0.026698	-0.00188568	0.994075
Cyclopentanone	120-92-3	795.686	793	NIST	0.124592	0.475144	0.0462941	0.108896	0.343093	0.163361
3-Methyl-2-butenal	107-86-8	796.496	758	NIST	0.00198879	0.354656	0.148713	0.000756	0.279607	0.261139
Hexanal	66-25-1	802.92	801	standard	0.072139	0.300386	0.225836	-0.0390164	-0.289043	0.244705
Mesityl oxide	141-79-7	803.635	803	standard	-0.0573108	-0.449522	0.0612648	-0.0691743	-0.459055	0.0553245
Butanoic acid	107-92-6	812.976	804	NIST	0.0452116	0.394552	0.105169	-0.00517943	0.150482	0.551165
Methyl pyruvate	600-22-6	815.814	710	NIST	-0.00144922	-0.156336	0.535594	-0.030514	-0.236248	0.345265
Furfural	98-01-1	838.007	832	standard	-0.0822904	-0.305455	0.217716	0.0347524	0.0601513	0.812585
Cyclopentenone	930-30-3	838.288	802	NIST	0.090967	0.540252	0.0206362	-0.0507887	-0.0249878	0.9216
2-Methyl-1H-pyrrole	636-41-9	843.175	853	NIST	-0.0939959	-0.45466	0.0580065	0.00729812	-0.020248	0.93644
Isovaleric acid	503-74-2	856.592	849	standard	0.0263711	0.290621	0.242022	0.165999	0.63365	0.00475078
Phenylethane	100-41-4	862.554	859	standard	-0.0562568	-0.165159	0.512515	-0.0694264	-0.230818	0.356787
2-methyl-Butanoic acid	116-53-0	864.994	846	NIST	-0.0553721	-0.0217373	0.931775	0.00709397	0.0234678	0.926357
4-Methyl-octane	2216-34-4	865.417	866	NIST	0.0314716	0.130747	0.605074	0.0727175	0.301999	0.223231
p-Xylene	106-42-3	870.575	867	standard	-0.115347	-0.493376	0.0374649	0.0322516	0.158913	0.528805
1-Hexanol	111-27-3	870.952	867	NIST	-0.0239546	-0.108164	0.669223	-0.209128	-0.843682	1.08e-05
Fufuryl alcohol	98-00-0	872.163	852	standard	0.113371	0.399746	0.100261	0.00285559	0.0767164	0.762226
(Z)-2-Hexenol	928-94-9	872.628	856	NIST	-0.0608964	-0.18312	0.467029	-0.174166	-0.633857	0.0047329
2-Heptanone	110-43-0	893.485	891	standard	0.0975714	0.429325	0.0754065	0.00246343	-0.0566391	0.823359
2-Cyclopentene-1,4-dione	930-60-9	893.491	880	NIST	-0.0606305	-0.0646199	0.798922	-0.0379583	-0.184739	0.463032
Styrene	100-42-5	894.292	895	NIST	0.0472836	0.114083	0.652175	0.0139732	-0.0898844	0.722823
Pentanoic acid	109-52-4	897.945	893	NIST	-0.0128836	0.23197	0.354325	-0.0133157	0.0921696	0.716048
1-Nitropentane	628-05-7	903.759	946	NIST	0.0300225	0.146991	0.560543	-0.0391022	-0.196976	0.433378
Heptanal	111-71-7	904.235	902	standard	0.0590702	0.340193	0.167182	-0.0279158	-0.18608	0.459732
…£-Butyrolactone	96-48-0	925.505	904	Adams	0.0960172	0.506844	0.0318194	-0.00403144	0.0513333	0.839693
2(5H)-Furanone	497-23-4	927.317	915	standard	0.0238459	0.182614	0.468281	-0.0217481	-0.0566965	0.823183
2-Cyclohexen-1-ol	822-67-3	929.976	883	NIST	0.0510171	0.288806	0.245108	0.0499926	0.310928	0.209165
1,2-Cyclooctanedione	3008-40-0	935.095	NA	NA	0.053801	0.172165	0.494528	-0.042751	-0.109851	0.664349
2-Hydroxycyclopent-2-en-1-one	10493-98-8	935.095	926	NIST	0.0543111	0.174984	0.487379	-0.0430547	-0.108308	0.668806
Œ±-Pinene	80-56-8	936.113	933	standard	-0.0328867	-0.0897923	0.723096	-0.0385783	-0.0062888	0.980242
N,N-Diethylformamide	617-84-5	947.145	921	NIST	0.0592693	0.354656	0.148713	0.022524	0.279607	0.261139
2	NA	959.42	NA	NA	0.0997727	0.49353	0.0373962	-0.0686567	-0.121283	0.631658
Benzaldehyde	100-52-7	963.984	960	standard	0.0212278	0.135018	0.593226	-0.0383023	-0.200531	0.424952
5-Methylfurfural	620-02-0	969.142	964	standard	-0.0373083	-0.140483	0.578211	0.00534714	-0.140711	0.577588
Geranic oxide	7392-19-0	972.861	971	NIST	-0.0421836	-0.0664969	0.793199	-0.0249697	-0.0391748	0.877349
1-Heptanol	111-70-6	973.043	970	standard	0.0486003	0.430185	0.0747593	0.0311962	0.0909033	0.7198
Œ≤-Pinene	127-91-3	979.665	977	standard	-0.0507711	-0.368124	0.132824	0.0507364	0.0506121	0.841918
1-Octen-3-one	4312-99-6	981.023	978	J Phys Chem	0.0367978	0.291788	0.24005	-0.0593506	-0.273261	0.272568
1-Octen-3-ol	3391-86-4	982.145	978	standard	0.0860718	0.493299	0.0374993	-0.105488	-0.31525	0.202569
Butyl methacrylate	97-88-1	989.824	989	NIST	-0.0159616	0.00051	0.998397	0.0102769	-0.0321832	0.899121
trans-Dehydroxylinalool oxide	54750-70-8	989.974	992	standard	-0.167216	-0.741158	0.000433	-0.0278023	-0.14608	0.563002
Sulcatone	110-93-0	990.002	987	standard	-0.201544	-0.803685	5.87e-05	-0.0692636	-0.256121	0.304957
Œ≤-Myrcene	123-35-3	990.042	990	NIST	-0.154379	-0.648402	0.00360784	-0.0667232	-0.252958	0.311175
Hexanoic acid	142-62-1	990.399	997	standard	0.0887381	0.615132	0.00658618	0.0275615	0.210218	0.402444
Phenol	108-95-2	990.558	981	standard	0.0419075	0.303048	0.221548	-0.0227269	-0.192209	0.44481
3	NA	993.796	NA	NA	-0.183215	-0.755332	0.00029	0.0308859	0.0460177	0.85612
2-Pentyl furan	3777-69-3	994.473	984	Adams	0.0211754	0.226718	0.36563	-0.0968617	-0.369376	0.131409
1,2,4-Trimethylbenzene	95-63-6	996.603	989	NIST	0.0223654	0.0769191	0.761615	0.147156	0.498736	0.0351328
2,6-Dimethyl-2-heptanol	13254-34-7	1002.01	1023	NIST	0.0479588	0.267913	0.282437	-0.112646	-0.379231	0.120644
Œ±-Hydroxy-…£-butyrolactone	19444-84-9	1003.92	NA	NA	-0.0791462	-0.27011	0.278357	-0.0154555	-0.0664853	0.793235
n-Octanal	124-13-0	1005.56	1002	standard	0.0767295	0.429519	0.0752601	-0.0605065	-0.303873	0.22023
(Z)-3-Hexenyl acetate	3681-71-8	1009.68	1005	standard	-0.0757097	-0.41973	0.0829083	-0.013186	0.0118976	0.962629
(E)-2-Hexenyl acetate	2497-18-9	1018.43	1015	NIST	-0.105599	-0.591502	0.00972112	-0.0794443	-0.463763	0.0525555
4-Cyanocyclohexene	100-45-8	1020.89	NA	NA	-0.0223298	-0.0406965	0.872621	0.0301894	0.141468	0.575521
2-Ethylhexanol	104-76-7	1030.99	1028	standard	-0.0183828	-0.0320477	0.899544	0.0368983	0.217075	0.386908
Limonene	138-86-3	1031.19	1029	standard	-0.0297502	-0.161087	0.523108	0.0716878	0.2457	0.325728
(Z)-Œ≤-Ocimene	3338-55-4	1039.86	1036	NIST	-0.148682	-0.606234	0.00765252	0.0850594	0.199269	0.427935
Benzyl alcohol	100-51-6	1040.29	1039	standard	-0.155104	-0.659835	0.00288622	-0.185543	-0.758584	0.000263
Dihydroisophorone	873-94-9	1041.25	NA	NA	-0.019795	0.00534286	0.983213	-0.0331306	-0.0227547	0.928589
Phenylacetaldehyde	122-78-1	1047.23	1046	standard	0.0506907	0.159335	0.527698	-0.0659924	-0.389915	0.109694
1-Methylpyrrolidone	872-50-4	1048.63	1043	NIST	0.0499614	0.212272	0.397755	-0.0449839	-0.175569	0.4859
(E)-Œ≤-Ocimene	3379-61-1	1050.76	1044	Adams	-0.195181	-0.751226	0.000326	0.00221031	-0.096787	0.702423
…£-Terpinene	99-85-4	1061.6	1060	standard	-0.0791461	-0.239365	0.33875	-0.0269297	0.0640417	0.800687
Acetophenone	98-86-2	1069.88	1065	standard	-0.021885	-0.0839615	0.74047	-0.0713574	-0.16687	0.508095
(E)-2-Octen-1-ol	18409-17-1	1071.11	1068	standard	0.057768	0.398528	0.101397	0.0217264	0.0326008	0.897819
4	NA	1071.31	NA	NA	0.0556152	0.12829	0.611932	0.00205876	-0.101236	0.689376
1-Octanol	111-87-5	1073.31	1070	standard	0.0535091	0.327966	0.183962	-0.0735348	-0.439455	0.0680413
cis-Linalool oxide (furanoid)	5989-33-3	1076.04	1075	NIST	-0.158473	-0.712518	0.000906	-0.118472	-0.518187	0.0275958
Heptanoic acid	111-14-8	1082.9	1079	standard	0.102261	0.621133	0.00593752	0.0591039	0.340649	0.166577
5	NA	1085.39	NA	NA	0.0353609	0.114192	0.651862	-0.00351768	0.106177	0.674981
trans-Linalool oxide (furanoid)	5989-33-3	1091.89	1075	NIST	-0.10393	-0.513436	0.0293083	-0.104734	-0.511278	0.0301127
p-Cymenene	1195-32-0	1092.55	1089	Adams	-0.0939326	-0.234117	0.34976	-0.00768647	0.162388	0.519713
6	NA	1097.74	NA	NA	0.0769997	0.330439	0.180482	-0.0773724	-0.292677	0.238553
7	NA	1097.88	NA	NA	0.0724559	0.243093	0.331049	0.128318	0.320417	0.194865
Linalool	78-70-6	1102.48	1099	NIST	-0.113657	-0.476997	0.0453312	0.0347506	-0.0117759	0.963011
1-Nonanal	124-19-6	1106.8	1104	standard	0.0277733	0.208744	0.405827	-0.107041	-0.44393	0.0649638
8	NA	1115.11	NA	NA	0.0592693	0.354656	0.148713	0.022524	0.279607	0.261139
Levoglucosenone	37112-31-5	1118.16	NA	NA	-0.0891972	-0.386174	0.113444	-0.113364	-0.310157	0.210356
Phenethyl alcohol	60-12-8	1119.11	1109	NIST	-0.0126291	-0.0930974	0.713304	-0.208199	-0.712735	0.000901
2-Ethylhexanoic acid	149-57-5	1124.34	1124	standard	0.0163813	0.248138	0.320796	-0.043279	0.00349819	0.989009
(E,E)-Allo-ocimene	3016-19-1	1132	1143	NIST	-0.175141	-0.683993	0.00174578	0.038089	0.0352456	0.889576
Nopinone	24903-95-5	1142.29	1120	NIST	-0.0310014	0.00482801	0.984831	-0.06301	-0.0910481	0.719371
Benzyl nitrile	140-29-4	1143.68	1140	NIST	-0.0662905	-0.490648	0.0386967	-0.103456	-0.468551	0.0498481
9	NA	1149.2	NA	NA	0.013239	0.0822724	0.745526	-0.0327022	-0.173529	0.491062
10	NA	1162.52	NA	NA	0.0592693	0.354656	0.148713	0.022524	0.279607	0.261139
Menthol	1490-04-6	1172.32	1167	NIST	0.0273594	0.142746	0.572042	0.1687	0.439067	0.0683131
11	NA	1172.37	NA	NA	0.00766879	0.14923	0.55452	0.0184768	0.192542	0.444006
1-Nonanol	143-08-8	1172.91	1171	standard	-0.104195	-0.589802	0.00998618	-0.0621819	-0.373065	0.127304
cis-Linalool oxide (pyranoid)	14009-71-3	1173.47	1175	NIST	-0.175371	-0.717319	0.000805	-0.149057	-0.616448	0.00643928
Benzoic acid	65-85-0	1176.32	1162	NIST	-0.0562254	-0.332364	0.177802	-0.0448899	-0.452717	0.0592229
Ethyl benzoate	93-89-0	1176.7	1170	NIST	-0.0497097	-0.256415	0.304384	-0.039108	-0.315412	0.202325
Linalool oxide pyranoside	41720-62-1	1178.45	NA	NA	-0.0593542	-0.211969	0.398445	-0.109087	-0.36487	0.136548
Octanoic acid	124-07-2	1179.75	1174	standard	0.0787864	0.488282	0.0397893	-0.0104156	0.158378	0.53021
4-Terpineol	562-74-3	1181.92	1181	standard	0.00186721	0.036854	0.884568	-0.0466738	-0.0708077	0.780095
Naphthalene	91-20-3	1187.91	1186	Phys Chem	-0.0340172	-0.00766057	0.975933	0.0435375	0.051253	0.839941
cis-3-Hexenyl butyrate	16491-36-4	1188.97	1186.4	NIST	-0.184853	-0.817165	3.48e-05	-0.180078	-0.683591	0.00176111
Diendiol I (2,6-Dimethylocta-3,7-diene-2,6-diol)	13741-21-4	1193.42	1186	NIST	-0.185191	-0.667595	0.00246763	-0.17288	-0.631752	0.0049171
Œ±-Terpineol	98-55-5	1195.52	1189	NIST	0.0218179	-0.0290487	0.908906	0.0626869	0.21859	0.383521
Methyl salicylate	119-36-8	1199.26	1198	standard	-0.0128968	-0.113723	0.653208	-0.139857	-0.476356	0.0456624
Decanal	112-31-2	1208.81	1206	standard	0.0631223	0.568845	0.013756	0.00107534	0.0751282	0.767018
12	NA	1213.27	NA	NA	-0.000345	0.0912742	0.7187	-0.121958	-0.233644	0.350763
2-Phenoxyethanol	122-99-6	1226.9	1221	NIST	0.0239856	0.211517	0.399474	0.0574844	0.167397	0.506735
Coumaran	496-16-2	1226.94	1219	NIST	-0.130706	-0.470291	0.0488911	-0.120105	-0.521572	0.0264236
Benzothiazole	95-16-9	1230.91	1223	standard	-0.0436012	-0.157786	0.53177	-0.134987	-0.574418	0.0126583
Methenamine	100-97-0	1234.2	1220	NIST	-0.0420098	-0.274151	0.270947	-0.0565468	-0.0123704	0.961145
cis-3-Hexenyl isovalerate	35154-45-1	1240	1238	NIST	-0.122972	-0.644647	0.00387479	-0.213045	-0.784076	0.000118
Caprolactam	105-60-2	1259.06	1253	NIST	0.0580616	0.346717	0.158668	0.0372381	0.278705	0.262744
Phenylethyl acetate	103-45-7	1262.01	1245	NIST	-0.0367704	-0.39955	0.100443	-0.0810225	-0.328933	0.182595
13	NA	1265.62	NA	NA	0.0804647	0.430073	0.0748436	-0.0519673	-0.243718	0.329769
Nonanoic acid	112-05-0	1276.93	1270	standard	0.0442717	0.336035	0.172767	-0.0991112	-0.323146	0.190875
14	NA	1283.26	NA	NA	-0.0745137	-0.348666	0.156183	-0.0498306	-0.371013	0.129576
p-tert-Butylphenol	98-54-4	1287.9	NA	NA	0.00752563	-0.00456243	0.985665	0.00961215	-0.0220127	0.930912
Indole	120-72-9	1300.38	1305	standard	-0.140534	-0.66878	0.00240832	-0.0905002	-0.535627	0.0219664
N,N-Dibutylformamide	761-65-9	1307.93	1310	NIST	0.0391503	0.115596	0.647845	-0.0896636	-0.463057	0.0529641
Undecanal	112-44-7	1309.98	1305	NIST	-0.00320896	-0.0372339	0.883385	0.00507546	0.164588	0.513993
p-Vinylguaiacol	7786-61-0	1319.98	1309	Adams	0.0182562	-0.0479877	0.850025	-0.0131251	-0.135973	0.590592
…£-Nonalactone	104-61-0	1367.98	1360	NIST	-0.122484	-0.50761	0.0315195	-0.125137	-0.557953	0.0161199
Decanoic acid	334-48-5	1370.5	1366	standard	-0.0265499	0.0878809	0.728778	-0.146575	-0.420869	0.0819902
(3-hydroxy-2,4,4-trimethylpentyl) 2-methylpropanoate	74367-34-3	1379.86	1387	NIST	-0.0949918	-0.392138	0.107507	-0.122201	-0.579295	0.0117559
(Z)-3-Hexenyl hexanoate	31501-11-8	1384.16	1379	NIST	-0.168564	-0.769791	0.000187	-0.195237	-0.827421	2.27e-05
Vanillin	121-33-5	1407.96	1403	standard	0.000226	0.0420995	0.868265	-0.0260955	-0.157225	0.533248
Dodecanal	112-54-9	1412.12	1409	standard	0.00357548	0.316448	0.200765	-0.000751	0.152368	0.546125
(E)-Caryopyllene	118-65-0	1417.49	1404	NIST	0.0592693	0.354656	0.148713	0.022524	0.279607	0.261139
Longifolene	475-20-7	1417.53	1412	NIST	0.0592693	0.354656	0.148713	0.022524	0.279607	0.261139
15	NA	1419.95	NA	NA	0.121246	0.360766	0.14135	0.0875945	0.268604	0.281149
Cedrene	469-61-4	1423.72	1406	NIST	0.0592693	0.354656	0.148713	0.022524	0.279607	0.261139
trans-Œ±-Bergamotene	13474-59-4	1444.47	1433	NIST	-0.185229	-0.646084	0.00377076	0.00889012	-0.0402139	0.87412
Geranylacetone	3796-70-1	1457.33	1452	NIST	-0.0126572	-0.181345	0.471431	0.0119746	-0.226156	0.366851
1-Dodecanol	112-53-8	1477.63	1473	standard	-0.044398	-0.0201115	0.936867	0.00338976	0.0120503	0.96215
4-Methylbiphenyl	644-08-6	1492.29	1492	NIST	0.00601089	0.354656	0.148713	0.00228431	0.279607	0.261139
(E,E)-Œ±-Farnesene	502-61-4	1513.31	1506	NIST	-0.215709	-0.813765	3.98e-05	-0.0245106	-0.177184	0.481834
2,4-Di-tert-butylphenol	96-76-4	1516.79	1513	NIST	-0.0439278	-0.154473	0.540527	-0.119614	-0.327889	0.184071
…£-Cadinene	39029-41-9	1520.32	1511	NIST	-0.0442161	-0.121468	0.631134	-0.0892919	-0.182387	0.468846
Butylated hydroxytoluene	128-37-0	1520.41	1533.3	NIST	-0.0912977	-0.48065	0.0434768	-0.0280618	-0.318083	0.198321
o-Hydroxybiphenyl	90-43-7	1524.03	1510	NIST	-0.0439101	-0.153413	0.543344	-0.0973856	-0.488982	0.0394637
Ethyl 4-ethoxybenzoate	23676-09-7	1531.43	1537	NIST	-0.0654098	-0.172399	0.493933	-0.088007	-0.217768	0.385357
Œ¥-Cadinene	483-76-1	1533.13	1521	NIST	-0.0484452	-0.364894	0.136522	-0.000662	-0.235964	0.345862
Dodecanoic acid	143-07-7	1569.82	1570	NIST	-0.072554	-0.247374	0.322337	-0.131069	-0.447827	0.062369
Fokienol	33440-00-5	1602.47	NA	NA	-0.0849493	-0.380633	0.119165	-0.0818009	-0.25429	0.308548
Cedrol	77-53-2	1616.89	1605.8	NIST	0.0592693	0.354656	0.148713	0.022524	0.279607	0.261139
cis-Methyl dihydrojasmonate	39647-11-5	1660.64	1655	standard	0.0238839	0.0695455	0.783927	0.161749	0.468774	0.0497249
Tetradecanol	112-72-1	1680.53	1676	NIST	-0.0305388	-0.0449013	0.859578	-0.0230613	-0.0745431	0.768785
2-Ethylhexyl benzoate	5444-75-7	1717.7	1735	NIST	-0.0883233	-0.225543	0.368186	-0.113222	-0.322855	0.191299
Tetradecanoic acid	544-63-8	1763.87	1759	standard	0.0290041	0.172607	0.493403	-0.0618919	-0.270635	0.277387
Benzyl benzoate	120-51-4	1775.46	1762	NIST	-0.0256561	-0.294251	0.235921	-0.0420481	-0.401453	0.098684
Anthracene	120-12-7	1792.39	1775	NIST	0.0592693	0.354656	0.148713	0.022524	0.279607	0.261139
2-Ethylhexyl-salicylate	118-60-5	1814.65	1811	standard	-0.00308409	-0.0505009	0.842262	0.0038343	0.156236	0.535858
Isopropyl tetradecanoate	110-27-0	1828.41	1826	standard	-0.00585665	-0.0822831	0.745494	-0.0867474	-0.437948	0.0691021
1-Hexadecanol	36653-82-4	1883.52	1883	standard	-0.0446038	-0.0889625	0.725561	0.0261929	0.0491332	0.846485
Homomenthyl salicylate	52253-93-7	1896.82	NA	NA	0.00379122	0.354656	0.148713	0.00144077	0.279607	0.261139
Hexadecanoic acid	57-10-3	1971.85	1958	standard	-0.00369622	0.155049	0.539001	-0.0211513	-0.21698	0.387122
Isopropyl hexadecanoate	142-91-6	2027.16	1999	NIST	0.00278864	0.142786	0.571932	0.0176453	0.0752527	0.766642
10,18-Bisnorabieta-8,11,13-triene	32624-67-2	2057.01	NA	NA	-0.0681442	-0.113766	0.653085	-0.14834	-0.457845	0.0560533
1-Octadecanol	112-92-5	2087.68	2077	Adams	0.00918691	0.180239	0.474186	-0.0964009	-0.292316	0.23916
